# Supplementary material for: The Mortality Effect of Apparent Temperature: A Multi-City Study in Asia
Source: MDPI journal article supplement (doi:10.3390/ijerph18094675), 2021-04-28
Supplement: s1 [file s1]

**Table S1.** Computed on the attributable fraction (%) to temperature (total, heat, and cold components), by varying lag, df, and controlling air pollution and influenza.

| Modelling choices                            | Minimum<br>mortality<br>percentile | Total(%)<br>(95% CI) | Cold(%)<br>(95% CI) | Heat(%)<br>(95% CI) |
|----------------------------------------------|------------------------------------|----------------------|---------------------|---------------------|
| Lag period: 15 days (10 cities)              | 85                                 | 7.63 (5.30, 9.78)    | 6.75 (4.61, 8.70)   | 0.88 (-0.09, 1.67)  |
| Lag period :25 days (10 cities)              | 58                                 | 6.09 (1.73, 9.63)    | 3.48 (1.49, 5.25)   | 2.60 (-1.78, 5.90)  |
| Df/year for seasonal control: 7 (10 cities)  | 81                                 | 6.45 (4.07, 8.64)    | 5.38 (3.00, 7.28)   | 1.08 (0.12, 1.95)   |
| Df/year for seasonal control: 9 (10 cities)  | 83                                 | 8.43 (5.57, 11.19)   | 7.29 (4.32, 9.72)   | 1.15 (0.02, 2.09)   |
| Df/year for seasonal control: 10 (10 cities) | 91.5                               | 8.24 (5.75, 10.44)   | 7.29 (4.85, 9.62)   | 0.94 (-0.06, 1.86)  |
| Air pollution control (Tianjin)              | 93                                 | 13.49 (2.54, 22.27)  | 13.05 (2.68, 21.96) | 0.44 (0.13, 0.71)   |
| Influenza control (Tianjin)                  | 93                                 | 11.74 (1.49, 20.46)  | 11.28 (0.85, 20.06) | 0.46 (0.12, 0.73)   |
| Air pollution+influenza control (Tianjin)    | 93                                 | 13.73 (2.85, 22.86)  | 13.27 (3.21, 22.19) | 0.45 (0.15, 0.70)   |
